# Supplementary material
Source: PubMed Central journal article supplement (PMC2234171)

**a**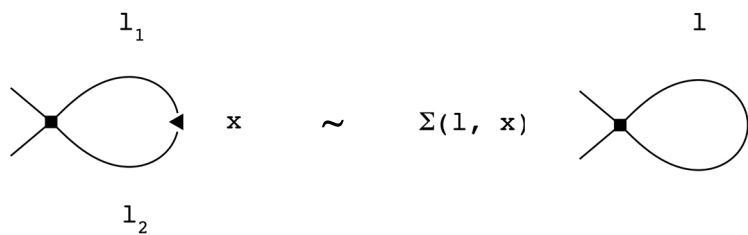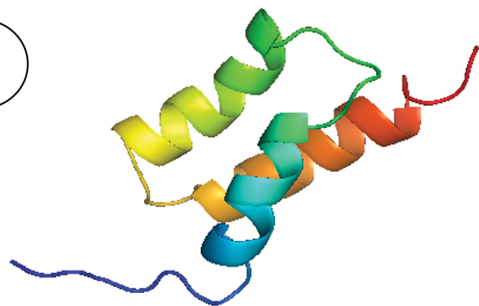**b**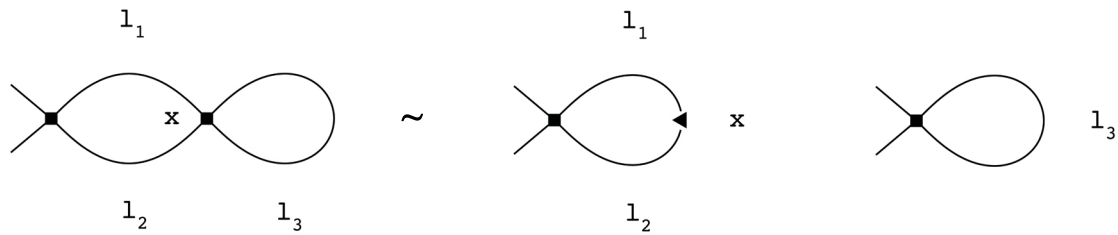**c**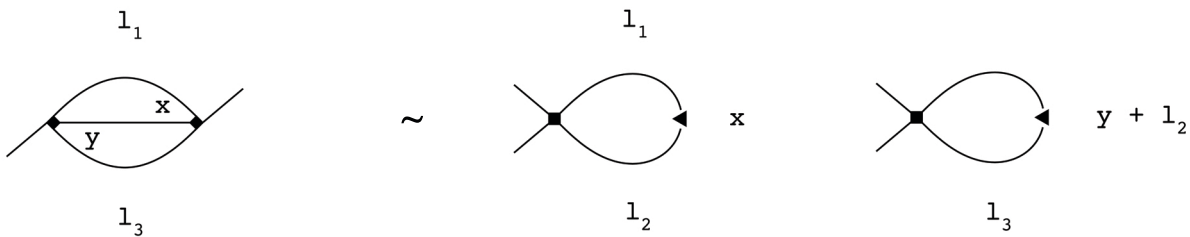

Supplement: pnas_0705707105_1.pdf [file pnas_0705707105_1.pdf]

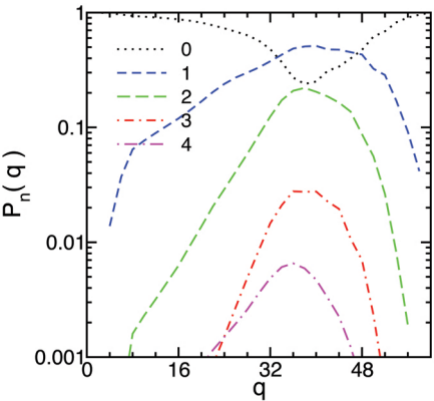

Supplement: pnas_0705707105_2.pdf [file pnas_0705707105_2.pdf]

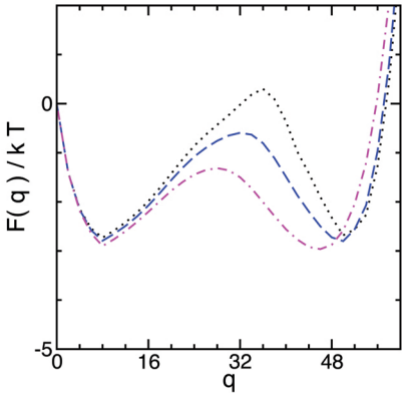

Supplement: pnas_0705707105_3.pdf [file pnas_0705707105_3.pdf]
